# Supplementary material for: Evaluated electron scattering cross section dataset for gaseous benzene in the energy range 0.1–1000 eV
Source: Royal Society of Chemistry journal article supplement (doi:10.1039/d3cp01908j), 2023-01-01
Supplement: d3cp01908j1.xlsx [file d3cp01908j1.xlsx]

## Sheet: Hoja1
Table SI. Integral cross sections by electron impact on benzene in 10-20m2
E(eV)	Elastic	Attachment	Vibrational	Excitation	Ion av	Ion single	Ion Double	Ion C K-shell	SUM
0.1	101.125	0	0.1	0	0	0	0	0	101.225
0.15	62.6872	0	0.123997	0	0	0	0	0	62.8112
0.2	44.6506	0	0.207592	0	0	0	0	0	44.8582
0.3	24.6689	0	0.533751	0	0	0	0	0	25.2027
0.4	15.8061	0	1.22323	0	0	0	0	0	17.0294
0.5	11.5199	0	2.49875	0	0	0	0	0	14.0186
0.7	8.93729	0	7.38635	0	0	0	0	0	16.3236
1	11.1	0	16.1758	0	0	0	0	0	27.2758
1.01166	11.2832	0	16.3693	0	0	0	0	0	27.6525
1.04618	11.831	0.1	16.8451	0	0	0	0	0	28.7761
1.06577	12.1452	0.298641	17.0529	0	0	0	0	0	29.4967
1.07941	12.3654	0.741834	17.1727	0	0	0	0	0	30.28
1.0981	12.669	2.07838	17.3067	0	0	0	0	0	32.0541
1.1	12.7	2.27568	17.3185	0	0	0	0	0	32.2942
1.10624	12.7995	3.00986	17.355	0	0	0	0	0	33.1643
1.11182	12.8887	3.77515	17.3848	0	0	0	0	0	34.0487
1.11973	13.0154	5.00816	17.4229	0	0	0	0	0	35.4464
1.13021	13.1837	6.79759	17.4662	0	0	0	0	0	37.4475
1.13659	13.2866	7.87924	17.489	0	0	0	0	0	38.6548
1.13994	13.3405	8.41403	17.4999	0	0	0	0	0	39.2545
1.14334	13.3955	8.9226	17.5104	0	0	0	0	0	39.8285
1.1484	13.4774	9.58878	17.5248	0	0	0	0	0	40.5909
1.15681	13.6138	10.6	17.5459	0	0	0	0	0	41.7597
1.18044	13.9989	10.38	17.5903	0	0	0	0	0	41.9691
1.18381	14.0541	9.67149	17.5952	0	0	0	0	0	41.3209
1.184	14.0572	9.65138	17.5955	0	0	0	0	0	41.3041
1.19379	14.2178	8.43499	17.6087	0	0	0	0	0	40.2615
1.2	14.32	7.59462	17.6164	0	0	0	0	0	39.531
1.21233	14.5133	6.11968	17.6309	0	0	0	0	0	38.2639
1.24393	15.0114	5.68911	17.6716	0	0	0	0	0	38.3721
1.25464	15.1811	6.54206	17.689	0	0	0	0	0	39.4121
1.25832	15.2396	6.86991	17.6956	0	0	0	0	0	39.8051
1.27835	15.5585	8.21681	17.738	0	0	0	0	0	41.5133
1.29511	15.8266	8.0388	17.7829	0	0	0	0	0	41.6483
1.3	15.905	7.73891	17.7976	0	0	0	0	0	41.4415
1.30505	15.9843	7.34004	17.8137	0	0	0	0	0	41.138
1.3184	16.1942	6.06195	17.8597	0	0	0	0	0	40.1159
1.33661	16.4814	4.60797	17.9301	0	0	0	0	0	39.0195
1.36959	17.0045	4.62591	18.0716	0	0	0	0	0	39.702
1.38617	17.2689	5.03351	18.1433	0	0	0	0	0	40.4457
1.39798	17.4576	4.93905	18.1916	0	0	0	0	0	40.5882
1.4	17.49	4.87984	18.1995	0	0	0	0	0	40.5693
1.41147	17.6703	4.32028	18.2416	0	0	0	0	0	40.2322
1.42159	17.8297	3.58641	18.2741	0	0	0	0	0	39.6902
1.4317	17.9894	2.75933	18.301	0	0	0	0	0	39.0498
1.43768	18.0839	2.27958	18.3138	0	0	0	0	0	38.6773
1.46037	18.4435	0.863387	18.337	0	0	0	0	0	37.6439
1.48061	18.7654	0.2613	18.3165	0	0	0	0	0	37.3433
1.4941	18.9807	0.1	18.2772	0	0	0	0	0	37.3579
1.5	19.075	0	18.253	0	0	0	0	0	37.328
1.50755	19.1932	0	18.2154	0	0	0	0	0	37.4085
1.52782	19.5109	0	18.076	0	0	0	0	0	37.5869
1.5442	19.7682	0	17.921	0	0	0	0	0	37.6893
1.56155	20.0417	0	17.7145	0	0	0	0	0	37.7562
1.57876	20.3136	0	17.4672	0	0	0	0	0	37.7808
1.59696	20.6019	0	17.162	0	0	0	0	0	37.7639
1.6	20.65	0	17.107	0	0	0	0	0	37.757
1.61501	20.7787	0	16.8191	0	0	0	0	0	37.5977
1.63406	20.9415	0	16.4189	0	0	0	0	0	37.3604
1.64741	21.0551	0	16.1197	0	0	0	0	0	37.1748
1.67594	21.297	0	15.4426	0	0	0	0	0	36.7396
1.7	21.5	0	14.8511	0	0	0	0	0	36.3511
1.7048	21.5553	0	14.7328	0	0	0	0	0	36.2881
1.72193	21.7526	0	14.3128	0	0	0	0	0	36.0655
1.7403	21.9642	0	13.872	0	0	0	0	0	35.8362
1.75679	22.1538	0	13.4901	0	0	0	0	0	35.6439
1.78936	22.5279	0	12.7865	0	0	0	0	0	35.3144
1.8	22.65	0	12.5732	0	0	0	0	0	35.2232
1.80776	22.75	0	12.4229	0	0	0	0	0	35.1729
1.82825	23.0142	0	12.0469	0	0	0	0	0	35.061
1.86509	23.4894	0	11.4359	0	0	0	0	0	34.9253
1.9	23.94	0	10.9052	0	0	0	0	0	34.8452
1.90025	23.9432	0	10.9015	0	0	0	0	0	34.8447
1.93667	24.4164	0	10.3534	0	0	0	0	0	34.7698
1.96869	24.8327	0	9.84262	0	0	0	0	0	34.6753
2	25.24	0	9.46847	0	0	0	0	0	34.7085
2.00316	25.2808	0	9.40013	0	0	0	0	0	34.6809
2.1	26.5307	0	8.33759	0	0	0	0	0	34.8683
2.2	27.7554	0	7.29856	0	0	0	0	0	35.054
2.3	28.9074	0	5.45857	0	0	0	0	0	34.366
2.4	29.9401	0	3.73794	0	0	0	0	0	33.678
2.5	30.9652	0	3.37483	0	0	0	0	0	34.34
2.6	31.7552	0	3.24677	0	0	0	0	0	35.002
2.8	33.3035	0	3.82249	0	0	0	0	0	37.126
3	34.8127	0	4.1373	0	0	0	0	0	38.95
3.2	35.9931	0	4.20023	0	0	0	0	0	40.1933
3.4	37.1383	0	4.19833	0	0	0	0	0	41.3367
3.5	37.6987	0	3.85959	0	0	0	0	0	41.5583
3.6	38.1579	0	3.62214	0	0	0	0	0	41.78
3.8	39.0547	0.1	3.41858	0	0	0	0	0	42.5733
4	39.4296	0.421685	3.30371	0	0	0	0	0	43.155
4.2	41.101	1.11092	3.19804	0	0	0	0	0	45.41
4.3	41.3288	1.70455	3.14829	0	0	0	0	0	46.1817
4.4	41.6616	2.19135	3.10043	0	0	0	0	0	46.9533
4.5	41.9894	3.43127	2.95435	0.1	0	0	0	0	48.475
4.6	42.3125	4.67423	2.89374	0.116203	0	0	0	0	49.9967
4.8	42.9453	1.56894	2.77036	0.15542	0	0	0	0	47.44
4.9	43.2552	2.1408	2.70693	0.178933	0	0	0	0	48.2819
5	43.5611	2.71541	2.64185	0.205418	0	0	0	0	49.1238
5.2	44.1611	1.07265	2.50528	0.268545	0	0	0	0	48.0076
5.3	44.4555	1.25516	2.43297	0.305872	0	0	0	0	48.4495
5.4	44.7462	1.44018	2.3574	0.34754	0	0	0	0	48.8914
5.5	45.0335	2.14432	2.27811	0.39396	0	0	0	0	49.8499
5.7	45.598	3.55976	2.10637	0.502851	0	0	0	0	51.767
5.8	45.8755	2.37094	2.01286	0.566299	0	0	0	0	50.8256
6	46.4211	0	1.80764	0.713909	0	0	0	0	48.9427
6.2	46.9551	0.549566	1.42865	0.893183	0	0	0	0	49.8265
6.4	47.4779	0.322127	1.03399	1.10955	0	0	0	0	49.9436
6.5	47.7354	0.205275	0.827975	1.23354	0	0	0	0	50.0022
6.6	47.9902	0	0.614642	1.36917	0	0	0	0	49.974
7	48.9853	0	0.2	1.84671	0	0	0	0	51.032
7.3	49.7075	0	0.1	2.02977	0	0	0	0	51.8373
7.5	50.1783	0	0	5.05275	0	0	0	0	55.2311
7.7	50.6411	0	0	5.06381	0	0	0	0	55.7049
8	52.4174	0	0	3.86316	0	0	0	0	56.2805
8.5	52.4174	0	0	5.22262	0	0	0	0	57.64
8.7	51.9131	0	0	6.00156	0	0	0	0	57.9147
9	51.1867	0	0	11.7899	0	0	0	0	62.9767
9.24	51.8281	0	0	11.651	0.1	0.1	0	0	63.5792
9.39	52.2246	0	0	11.564	0.11366	0.11366	0	0	63.9023
9.5	52.5132	0	0	11.4001	0.124688	0.124688	0	0	64.038
10	51.3498	0	0	10.3128	0.187475	0.187475	0	0	61.85
11	51.5513	0	0	9.96465	0.4	0.4	0	0	61.916
11.5	51.0922	0	0	9.11229	0.4945	0.4945	0	0	60.699
12	50.6564	0	0	7.61771	0.60785	0.60785	0	0	58.882
13	50.2716	0	0	6.84595	0.8305	0.8305	0	0	57.948
14	49.9178	0	0	5.68869	1.1075	1.1075	0	0	56.714
15	49.8751	0	0	4.85341	1.4515	1.4515	0	0	56.18
16	48.6031	0	0	4.91435	1.829	1.829	0	0	55.3465
16.5	48.0081	0	0	4.94367	2.0498	2.0498	0	0	55.0016
17	47.4378	0	0	4.97229	2.284	2.284	0	0	54.6941
17.5	46.8906	0	0	5.00023	2.5405	2.5405	0	0	54.4313
18	46.3648	0	0	5.02754	2.8185	2.81767	0.00082764	0	54.2108
18.5	45.859	0	0	5.05424	3.1175	3.11561	0.00188609	0	54.0308
19	45.3721	0	0	5.08037	3.4345	3.43136	0.00314257	0	53.887
20	44.45	0	0	5.131	4.179	4.17252	0.00647745	0	53.76
22	42.7886	0	0	5.13112	5.2534	5.23856	0.0148409	0	53.1731
25	40.6573	0	0	5.13128	6.795	6.76262	0.0323782	0	52.5836
30	37.8	0	0	5.1315	9.1485	9.06196	0.0865448	0	52.08
35	35.3293	0	0	4.93673	10.401	10.249	0.151959	0	50.667
40	33.32	0	0	4.774	11.466	11.2442	0.22181	0	49.56
45	31.6571	0	0	4.39299	12.004	11.7232	0.280774	0	48.0541
50	30.24	0	0	4.078	12.442	12.11	0.332015	0	46.76
60	28.0485	0	0	3.65751	12.758	12.3886	0.369408	0	44.464
70	26.32	0	0	3.336	12.904	12.5189	0.38512	0	42.56
80	24.8934	0	0	3.10368	12.7773	12.3749	0.402422	0	40.7745
90	23.6995	0	0	2.91223	12.5907	12.1648	0.425879	0	39.2023
100	22.68	0	0	2.751	12.369	11.9253	0.443676	0	37.8
120	20.9087	0	0	2.69084	11.8066	11.3797	0.426927	0	35.4062
150	18.928	0	0	2.619	10.933	10.5499	0.383147	0	32.48
200	16.464	0	0	2.1505	9.6655	9.3505	0.314999	0	28.28
250	14.6056	0	0	2.08191	8.6975	8.43114	0.266361	0	25.385
300	13.244	0	0	2.0275	7.8285	7.5983	0.230197	6e-23	23.1
400	11.172	0	0	1.8045	6.5675	6.37714	0.190359	1.224e-22	19.544
500	9.716	0	0	1.646	5.69	5.51387	0.176134	1.577e-22	17.052
600	8.59937	0	0	1.48132	5.056	4.90551	0.150492	1.836e-22	15.1367
700	7.756	0	0	1.355	4.497	4.36656	0.130435	1.896e-22	13.608
800	7.02945	0	0	1.26174	4.10933	3.98868	0.12065	2.04e-22	12.4005
900	6.44529	0	0	1.18482	3.76166	3.63172	0.129947	2.04e-22	11.3918
1000	5.964	0	0	1.12	3.444	3.28428	0.159715	2.058e-22	10.528
