# Supplementary material for: Evaluated electron scattering cross section dataset for gaseous benzene in the energy range 0.1–1000 eV
Source: Royal Society of Chemistry journal article supplement (doi:10.1039/d3cp01908j), 2023-01-01
Supplement: d3cp01908j2.xlsx [file d3cp01908j2.xlsx]

## Sheet: electron_benzene_elastic_DCS
Table SII. Elastic differential cross sections by electron impact on benzene in 10-20m2sr-1
	Energy (eV)
Angle (Degrees)	0.1	0.2	0.3	0.4	0.5	0.6	0.7	0.8	0.9	1	1.5	1.6	1.7	1.8	1.9	2	2.1	2.2	2.3	2.4	2.5	3	3.5	4	4.3	4.5	4.8	4.9	5	5.3	5.5	5.8	6	6.5	7	7.5	8	8.5	9	9.5	10	12	14	15	20	30	40	50	70
0	11.2216	7.62333	6.13461	5.20562	4.54927	4.07782	3.74917	3.53801	3.4327	3.41059	5.18527	7.47944	16.0597	18.469	8.35345	5.92375	5.65329	5.89917	6.32963	6.84533	7.4062	10.2974	12.3704	14.4519	16.6525	18.941	25.115	26.6966	26.5198	23.8391	24.4186	26.3655	30.7264	32.3401	35.1163	42.871	43.7445	48.2502	50.9904	58.063	59.4032	63.675	71.3671	73.2953	143.36	181.44	214.76	243.04	288.4
2.5	11.2153	7.61388	6.12268	5.19172	4.53367	4.06064	3.73038	3.51749	3.41022	3.38589	5.1351	7.40434	15.902	18.3165	8.29773	5.88823	5.61993	5.86435	6.29232	6.8052	7.36317	10.2409	12.3115	14.3738	16.549	18.8102	24.9163	26.484	26.3131	23.6616	24.2299	26.1484	30.444	32.0419	34.7884	42.4358	43.2816	47.7051	50.4099	57.3521	58.6801	62.8195	70.2642	72.0658	126.14	156.24	181.02	201.04	230.44
5	11.1967	7.58576	6.0872	5.15043	4.48738	4.00966	3.67469	3.45674	3.34373	3.31292	4.98739	7.18317	15.4371	17.8655	8.1329	5.78327	5.52151	5.76168	6.18235	6.68695	7.23636	10.0744	12.1375	14.1437	16.2448	18.4261	24.3324	25.8588	25.705	23.1398	23.6757	25.511	29.6161	31.1667	33.8254	41.1601	41.9247	46.1091	48.7102	55.2721	56.5638	60.3229	67.0581	68.4993	108.08	129.36	144.76	155.96	168.84
7.5	11.1662	7.5397	6.02909	5.08288	4.41177	3.92658	3.5841	3.35813	3.23603	3.19495	4.75023	6.82799	14.6887	17.136	7.86576	5.61356	5.36275	5.5963	6.00535	6.49671	7.03242	9.80686	11.8565	13.7741	15.7579	17.8121	23.399	24.8584	24.7311	22.3047	22.7898	24.4938	28.2993	29.7708	32.2881	39.1299	39.7651	43.5747	46.0113	51.9759	53.2067	56.3866	62.0415	62.9423	89.88	102.76	110.18	113.82	114.1
10	11.1248	7.4768	5.9498	4.99087	4.30905	3.81402	3.46177	3.22539	3.09151	3.03712	4.43632	6.35777	13.6944	16.1597	7.50708	5.38642	5.151	5.37621	5.77008	6.244	6.76162	9.45208	11.481	13.2846	15.1163	17.0051	22.1714	23.5411	23.447	21.2045	21.6249	23.1597	26.5806	27.9417	30.2709	36.4778	36.9445	40.2758	42.4978	47.6983	48.8438	51.3164	55.6541	55.9135	72.8	78.4	79.52	78.12	70.84
12.5	11.0733	7.39846	5.85112	4.87668	4.18201	3.67538	3.31173	3.0633	2.9158	2.84603	4.06194	5.79687	12.5028	14.9783	7.07089	5.11116	4.89556	5.11145	5.48753	5.94079	6.43689	9.02736	11.0275	12.7001	14.3557	16.0515	20.7199	21.9805	21.9231	19.9	20.2471	21.5872	24.568	25.7888	27.8922	33.3684	33.6395	36.4282	38.3983	42.7292	43.7659	45.4841	48.4204	48.0279	57.54	57.82	54.74	50.68	41.3
15	11.0131	7.30624	5.73513	4.74292	4.03387	3.51453	3.13862	2.87734	2.71534	2.62921	3.64559	5.17321	11.1706	13.6408	6.57358	4.79842	4.60689	4.8133	5.16999	5.60043	6.07263	8.55192	10.5149	12.0488	13.5159	15.0029	19.1229	20.2593	20.2382	18.4592	18.7302	19.8637	22.3792	23.4332	25.2836	29.9818	30.0447	32.2673	33.9615	37.3829	38.2893	39.2832	40.8803	39.9115	44.24	40.88	36.12	31.08	22.708
17.5	10.9452	7.20174	5.60398	4.59234	3.86804	3.33562	2.94738	2.67336	2.49701	2.39468	3.20681	4.51636	9.75836	12.2014	6.03296	4.45942	4.29585	4.49338	4.83009	5.23661	5.68359	8.04533	9.96321	11.3598	12.6376	13.9122	17.4606	18.4621	18.4734	16.9513	17.1487	18.0768	20.1305	20.9965	22.5776	26.496	26.3541	28.0249	29.4313	31.9661	32.7242	33.0858	33.5245	32.1236	33.32	28.28	23.044	18.76	12.698
20	10.8706	7.0865	5.45981	4.42772	3.68797	3.14284	2.74302	2.45725	2.26771	2.15045	2.76487	3.85572	8.32758	10.7159	5.46739	4.10541	3.97309	4.16296	4.48004	4.86253	5.28394	7.52612	9.39235	10.6609	11.7588	12.8283	15.8082	16.6688	16.7054	15.441	15.5721	16.3072	17.9264	18.5908	19.8971	23.0717	22.7443	23.9091	25.0261	26.7506	27.3475	27.2076	26.7448	25.0975	24.64	18.928	14.42	11.228	7.56
22.5	10.7903	6.96194	5.30463	4.25172	3.49701	2.94026	2.53037	2.23472	2.03406	1.90418	2.3378	3.21889	6.93688	9.23949	4.89497	3.74712	3.64859	3.83248	4.131	4.4902	4.88653	7.01074	8.82063	9.97672	10.9124	11.7932	14.2308	14.949	15.0013	13.9844	14.0597	14.6232	15.8524	16.3106	17.3461	19.8413	19.3616	20.0886	20.9226	21.953	22.3821	21.8849	20.8065	19.1085	17.976	12.642	9.226	7.168	5.222
25	10.7049	6.82932	5.14032	4.06684	3.29831	2.73171	2.31401	2.01106	1.8022	1.6629	1.9416	2.63044	5.63941	7.82368	4.3328	3.39449	3.3313	3.51113	3.79278	4.13005	4.50243	6.5129	8.26376	9.32683	10.1239	10.8391	12.7791	13.3576	13.4146	12.6256	12.6574	13.0764	13.97	14.2272	15.0041	16.9014	16.3131	16.6831	17.2468	17.723	17.9846	17.2649	15.8432	14.2705	12.992	8.512	6.188	5.012	4.004
27.5	10.6149	6.68968	4.96853	3.87535	3.09478	2.52071	2.09806	1.79108	1.57761	1.43281	1.58969	2.11098	4.48055	6.51437	3.79642	3.05639	3.02904	3.20678	3.47357	3.79072	4.14073	6.04324	7.73401	8.72502	9.4098	9.98656	11.4873	11.9326	11.9832	11.3948	11.3959	11.6996	12.3163	12.3867	12.9227	14.3116	13.6639	13.7605	14.072	14.1409	14.2427	13.4098	11.871	10.5571	9.464	6.02	4.536	3.864	3.262
30	10.5206	6.5439	4.79074	3.67933	2.88903	2.31044	1.88624	1.579	1.36504	1.21923	1.29259	1.67653	3.4962	5.34978	3.29932	2.74047	2.74834	2.92585	3.17995	3.47902	3.80847	5.6093	7.23974	8.17881	8.77793	9.24475	10.3724	10.6946	10.7284	10.3081	10.2906	10.5076	10.9045	10.8095	11.1264	12.096	11.4379	11.3401	11.4221	11.2234	11.1799	10.3094	8.81675	7.8392	7.028	4.508	3.584	3.164	2.66
32.5	10.4223	6.39274	4.60827	3.48063	2.68343	2.10371	1.68177	1.37844	1.1685	1.02649	1.05778	1.33823	2.71183	4.35909	2.8526	2.45311	2.49452	2.67337	2.91691	3.19997	3.51071	5.2157	6.78538	7.6897	8.22758	8.61181	9.43545	9.6471	9.65582	9.36896	9.34282	9.49851	9.72829	9.4937	9.61476	10.2488	9.62355	9.39989	9.27988	8.93434	8.7659	7.90057	6.55126	5.92898	5.418	3.612	2.996	2.6516	2.1672
35	10.3201	6.23686	4.42231	3.28094	2.48011	1.90301	1.48744	1.19243	0.991219	0.858013	0.889673	1.10227	2.14189	3.56158	2.46469	2.19937	2.27163	2.45302	2.68794	2.95693	3.25069	4.86445	6.37167	7.25394	7.75092	8.07683	8.6636	8.77971	8.75782	8.56952	8.54225	8.65717	8.76587	8.41928	8.36801	8.74113	8.18189	7.88756	7.59771	7.19987	6.93175	6.08817	4.92203	4.62248	4.368	3.052	2.5452	2.212	1.7696
37.5	10.214	6.07689	4.23401	3.08184	2.28098	1.71053	1.30563	1.02346	0.835713	0.71628	0.789717	0.96993	1.78989	2.96635	2.14128	1.98294	2.08257	2.2672	2.49512	2.7517	3.02994	4.55534	5.99628	6.86369	7.33482	7.62213	8.03365	8.07075	8.01611	7.89391	7.87016	7.95895	7.98549	7.55328	7.35244	7.52929	7.0561	6.73188	6.30868	5.92377	5.58478	4.76373	3.77931	3.73255	3.696	2.6404	2.1686	1.8438	1.4602
40	10.1044	5.91352	4.04451	2.88483	2.08781	1.52818	1.1383	0.873438	0.703779	0.602877	0.756496	0.93787	1.64885	2.57255	1.88532	1.80619	1.92902	2.11712	2.33922	2.58468	2.8485	4.28635	5.65458	6.50846	6.96293	7.22609	7.51576	7.49129	7.40534	7.32097	7.30258	7.374	7.3502	6.85565	6.52694	6.56186	6.1811	5.85425	5.33757	5.00226	4.62332	3.82055	2.99333	3.1096	3.22	2.3072	1.8396	1.5456	1.2096
42.5	9.99142	5.74748	3.85494	2.69136	1.90223	1.35763	0.987033	0.743756	0.596506	0.518496	0.785921	0.998445	1.7022	2.37009	1.69708	1.67012	1.81154	2.00279	2.21976	2.45494	2.70503	4.054	5.34056	6.1766	6.61789	6.86591	7.0774	7.00902	6.89659	6.82728	6.81367	6.8712	6.8222	6.28457	5.84881	5.78645	5.49215	5.1785	4.60984	4.33618	3.94876	3.16361	2.46221	2.64959	2.898	2.0174	1.5708	1.3174	0.9954
45	9.87552	5.57959	3.66649	2.50283	1.72569	1.20026	0.852978	0.635226	0.51425	0.462925	0.871441	1.14019	1.925	2.34087	1.57439	1.57444	1.72954	1.92309	2.13511	2.36036	2.59694	3.8538	5.04771	5.85682	6.28333	6.52022	6.68702	6.59199	6.46077	6.38988	6.37861	6.42159	6.36647	5.80101	5.27862	5.1548	4.93172	4.63835	4.05856	3.83988	3.47428	2.71447	2.11237	2.29134	2.6348	1.764	1.3552	1.1396	0.8008
47.5	9.75715	5.41072	3.48034	2.32054	1.55947	1.05712	0.736843	0.548066	0.456619	0.435038	1.00434	1.3484	2.28557	2.46025	1.51291	1.5176	1.68135	1.87584	2.08254	2.29773	2.5206	3.68054	4.76983	5.53936	5.94561	6.17124	6.31719	6.21166	6.07143	5.98843	5.97591	6.00102	5.95345	5.37215	4.78376	4.62634	4.45399	4.18208	3.62886	3.44661	3.13001	2.41241	1.89376	2.00701	2.4136	1.5512	1.1956	0.9926	0.6314
50	9.63683	5.24178	3.29762	2.14569	1.40458	0.928913	0.638845	0.481869	0.42246	0.432813	1.17411	1.60591	2.74741	2.6989	1.50649	1.49689	1.66424	1.85784	2.05838	2.26292	2.47148	3.52869	4.50169	5.21698	5.59498	5.80624	5.9468	5.84531	5.70693	5.60683	5.58905	5.59192	5.56078	4.97358	4.34033	4.17025	4.02715	3.77459	3.28001	3.1105	2.865	2.21278	1.77282	1.7895	2.212	1.3804	1.0696	0.8596	0.4872
52.5	9.51511	5.07365	3.1194	1.97927	1.26179	0.815955	0.558697	0.435612	0.409893	0.453396	1.36897	1.89397	3.27132	3.02474	1.54767	1.50863	1.67464	1.86513	2.05819	2.25111	2.44445	3.39276	4.2394	4.8855	5.22627	5.41843	5.56248	5.47749	5.3518	5.23413	5.20731	5.18395	5.1742	4.5901	3.93376	3.76593	3.63341	3.39692	2.98543	2.80567	2.64641	2.084	1.72544	1.64033	2.0314	1.2488	0.9646	0.735	0.3752
55	9.39253	4.90717	2.94662	1.8221	1.13155	0.718158	0.495622	0.407702	0.416394	0.49323	1.57648	2.19327	3.81775	3.40501	1.62816	1.54841	1.70831	1.89312	2.07704	2.25706	2.43407	3.26763	3.98064	4.5439	4.83899	5.00702	5.15889	5.10041	4.99726	4.86473	4.8259	4.77388	4.78748	4.21535	3.558	3.40234	3.26725	3.04394	2.73105	2.5232	2.45684	2.00428	1.73158	1.56032	1.8704	1.148	0.868	0.616	0.2968
57.5	9.26956	4.74312	2.78008	1.67477	1.01402	0.635067	0.448413	0.396067	0.438931	0.548241	1.7842	2.48504	4.34903	3.80825	1.73942	1.61136	1.76063	1.93696	2.10981	2.27546	2.43492	3.14889	3.72463	4.19419	4.4369	4.57662	4.73812	4.71357	4.64091	4.49801	4.44534	4.36461	4.40151	3.85043	3.21379	3.07628	2.93243	2.72075	2.5126	2.26666	2.29055	1.95864	1.77216	1.54402	1.7304	1.0668	0.7714	0.5068	0.2513
60	9.14663	4.58215	2.62043	1.53765	0.909063	0.565908	0.415519	0.398287	0.474142	0.614068	1.98041	2.75207	4.83152	4.20604	1.87314	1.69247	1.82686	1.99178	2.15148	2.3012	2.44192	3.03303	3.47193	3.84081	4.02716	4.13616	4.3083	4.32248	4.28576	4.13739	4.07042	3.9636	4.02271	3.5019	2.90642	2.7901	2.63835	2.43846	2.33219	2.04701	2.14931	1.93668	1.82836	1.57822	1.6128	0.9968	0.6776	0.4116	0.22904
62.5	9.0241	4.42484	2.46817	1.41091	0.816339	0.509655	0.395147	0.411734	0.518523	0.686302	2.15474	2.9797	5.2374	4.57448	2.02172	1.7869	1.90244	2.05296	2.19739	2.3297	2.45061	2.91761	3.22415	3.48993	3.61924	3.69739	3.88174	3.9369	3.93873	3.78912	3.70874	3.58099	3.66104	3.17933	2.64322	2.54915	2.39633	2.20998	2.19487	1.87769	2.03849	1.93108	1.88268	1.64354	1.5148	0.9296	0.5838	0.3374	0.224
65	8.90227	4.27164	2.32365	1.29453	0.735293	0.465101	0.385363	0.433715	0.568603	0.760706	2.29866	3.15642	5.54589	4.89526	2.17857	1.89009	1.98311	2.11634	2.24346	2.35699	2.45725	2.80121	2.98357	3.14861	3.22359	3.27327	3.47267	3.56878	3.60888	3.46085	3.36912	3.22766	3.32768	2.89299	2.43126	2.3593	2.21628	2.04649	2.10562	1.77029	1.96385	1.93676	1.92089	1.71801	1.4308	0.8596	0.4984	0.2828	0.22652
67.5	8.78136	4.12293	2.18709	1.18836	0.665225	0.430922	0.384185	0.461586	0.621098	0.833391	2.40584	3.2744	5.74402	5.15616	2.33829	1.99796	2.0651	2.17829	2.28625	2.37986	2.45893	2.68335	2.75276	2.82396	2.8505	2.87637	3.09513	3.2302	3.30568	3.16024	3.06014	2.91347	3.03307	2.65177	2.27544	2.22484	2.10424	1.95467	2.06699	1.73152	1.92917	1.9503	1.93407	1.78134	1.3608	0.7854	0.4214	0.24892	0.23086
70	8.66159	3.979	2.05857	1.09208	0.605318	0.405734	0.389659	0.49285	0.673019	0.900953	2.47227	3.32956	5.82675	5.35119	2.49667	2.10692	2.14508	2.23575	2.32294	2.39582	2.45352	2.56424	2.5342	2.52239	2.50896	2.51749	2.76107	2.93153	3.03736	2.89377	2.78882	2.64586	2.78507	2.46159	2.17717	2.14696	2.06082	1.9352	2.07766	1.76136	1.93487	1.96968	1.91978	1.8187	1.2936	0.7112	0.3584	0.22932	0.23324
72.5	8.54317	3.84006	1.93811	1.00531	0.554685	0.388147	0.39992	0.525232	0.721757	0.960549	2.49625	3.32148	5.79654	5.48017	2.65065	2.21383	2.22021	2.28615	2.35132	2.403	2.43953	2.44457	2.33001	2.24903	2.20587	2.20467	2.47899	2.68009	2.80975	2.66589	2.55978	2.42893	2.58799	2.32456	2.13381	2.12288	2.08071	1.98231	2.13203	1.85272	1.97759	1.99378	1.8819	1.82296	1.2334	0.6342	0.3108	0.2219	0.23142
75	8.42632	3.70632	1.82563	0.92758	0.512406	0.376807	0.413246	0.556728	0.765133	1.00995	2.47824	3.25306	5.66243	5.54801	2.7981	2.31592	2.28798	2.3274	2.36966	2.40004	2.41596	2.32521	2.14177	2.00731	1.94553	1.94254	2.25309	2.47933	2.62551	2.47845	2.37473	2.26312	2.44197	2.23868	2.13864	2.14585	2.15317	2.08441	2.22061	1.99228	2.05039	2.02192	1.82926	1.79518	1.1704	0.5628	0.27608	0.22176	0.22624
77.5	8.3113	3.57795	1.72102	0.858369	0.477563	0.370439	0.428096	0.585646	0.801425	1.04753	2.42059	3.12999	5.43886	5.56363	2.93753	2.41073	2.34623	2.35772	2.37659	2.38596	2.38222	2.20702	1.97032	1.79883	1.72947	1.73222	2.08312	2.32862	2.48396	2.33065	2.23244	2.14534	2.34327	2.19821	2.18153	2.20563	2.26324	2.22537	2.33109	2.16222	2.1436	2.05325	1.77314	1.74334	1.1074	0.497	0.25424	0.22568	0.2184
80	8.19838	3.4551	1.62414	0.797159	0.449273	0.36788	0.443142	0.610621	0.829373	1.07228	2.32719	2.96019	5.14421	5.53866	3.06786	2.49595	2.393	2.37562	2.37103	2.36005	2.33792	2.09068	1.81582	1.62337	1.55657	1.5715	1.96477	2.22359	2.38129	2.21924	2.12902	2.06956	2.2848	2.19439	2.24994	2.28962	2.39342	2.38645	2.44981	2.34247	2.24597	2.08629	1.72449	1.67966	1.0444	0.4396	0.24192	0.23072	0.20944
82.5	8.08786	3.33791	1.53482	0.743425	0.4267	0.36809	0.457277	0.630623	0.848164	1.08377	2.20317	2.75312	4.79923	5.48609	3.18804	2.56939	2.4265	2.37981	2.35212	2.3218	2.28284	1.97661	1.67773	1.4791	1.42345	1.4554	1.89043	2.15693	2.31122	2.13904	2.05855	2.02758	2.25725	2.21654	2.33025	2.38415	2.52559	2.54825	2.56323	2.5131	2.34584	2.11856	1.69151	1.61756	0.9786	0.392	0.23744	0.23576	0.20062
85	7.98004	3.2265	1.45285	0.696639	0.409062	0.370162	0.469613	0.644933	0.857398	1.08205	2.05445	2.51917	4.4255	5.41886	3.29686	2.62889	2.4451	2.36917	2.31916	2.27085	2.21688	1.86493	1.55494	1.3629	1.32502	1.37697	1.85035	2.11939	2.2659	2.08359	2.01379	2.01007	2.25014	2.25324	2.40911	2.47596	2.64292	2.69269	2.65933	2.65643	2.43239	2.14663	1.67811	1.56872	0.9128	0.3528	0.238	0.23968	0.19292
87.5	7.87517	3.12095	1.37801	0.656268	0.395629	0.373309	0.479465	0.653121	0.85704	1.06763	1.88747	2.26902	4.04403	5.34866	3.39268	2.6723	2.44729	2.34276	2.27165	2.20699	2.14003	1.75553	1.44592	1.2708	1.25509	1.32808	1.83384	2.10096	2.23683	2.04588	1.98698	2.00752	2.253	2.29341	2.47472	2.55342	2.73147	2.80468	2.72858	2.75868	2.49665	2.1664	1.68364	1.54114	0.8512	0.3248	0.24262	0.24276	0.18718
90	7.77345	3.02126	1.31	0.621764	0.385712	0.376859	0.486337	0.655015	0.847378	1.04136	1.70882	2.01309	3.67397	5.28481	3.47333	2.69751	2.43175	2.29987	2.20928	2.13019	2.0524	1.64812	1.34886	1.19838	1.20705	1.30033	1.83041	2.09197	2.21581	2.01902	1.97059	2.01105	2.2564	2.32731	2.51782	2.60751	2.78134	2.87333	2.76452	2.811	2.53221	2.17374	1.70374	1.53821	0.7924	0.3052	0.24948	0.24556	0.18284
92.5	7.67501	2.92736	1.2485	0.592568	0.378666	0.380245	0.489904	0.650675	0.828979	1.00443	1.52496	1.76111	3.33163	5.23357	3.53608	2.70251	2.39742	2.24008	2.13202	2.04066	1.95434	1.54237	1.26186	1.14113	1.17443	1.28575	1.83078	2.084	2.19576	1.99686	1.95791	2.01312	2.25263	2.34724	2.53241	2.63246	2.78735	2.89263	2.76396	2.80986	2.53571	2.16522	1.73183	1.55896	0.7406	0.2954	0.25872	0.2485	0.18032
95	7.57991	2.83915	1.19311	0.568119	0.373901	0.383021	0.490016	0.640381	0.802657	0.958267	1.34204	1.5217	3.02968	5.19768	3.57774	2.68555	2.34363	2.16335	2.04025	1.93898	1.84649	1.43805	1.18308	1.09486	1.15138	1.27742	1.82758	2.07056	2.17123	1.97436	1.94348	2.00794	2.23622	2.34792	2.51599	2.62584	2.74912	2.86169	2.72683	2.75688	2.50692	2.13878	1.761	1.59897	0.6944	0.2912	0.26936	0.25256	0.17948
97.5	7.48814	2.75644	1.14345	0.547876	0.3709	0.384864	0.486697	0.62462	0.769452	0.904534	1.16563	1.30211	2.77677	5.17633	3.59492	2.64532	2.27022	2.07018	1.93479	1.82614	1.72989	1.33513	1.11087	1.05588	1.13301	1.26982	1.81577	2.04744	2.13872	1.94785	1.92334	1.99167	2.20417	2.32667	2.46944	2.58851	2.67065	2.7843	2.65586	2.65829	2.4486	2.09422	1.78546	1.65173	0.658	0.2968	0.28238	0.25802	0.18004
100	7.39965	2.67904	1.09909	0.531333	0.369234	0.38559	0.480147	0.604077	0.730606	0.845059	1.00067	1.10804	2.57732	5.16546	3.5843	2.58109	2.17771	1.9617	1.81709	1.70371	1.60608	1.23394	1.04389	1.02125	1.11559	1.25908	1.79273	2.01279	2.09673	1.91512	1.89511	1.9624	2.15577	2.28322	2.39658	2.52407	2.55947	2.66823	2.556	2.52396	2.366	2.03344	1.80163	1.70994	0.63	0.308	0.2968	0.26544	0.182
102.5	7.31436	2.60672	1.05964	0.518036	0.368571	0.385153	0.470731	0.579613	0.687519	0.781801	0.851313	0.943524	2.43166	5.15832	3.54298	2.49297	2.06739	1.83974	1.68923	1.57383	1.47713	1.13518	0.981246	0.988829	1.09661	1.24291	1.75805	1.96685	2.04559	1.87534	1.85784	1.91996	2.09242	2.21938	2.30345	2.43826	2.42551	2.52415	2.43391	2.36629	2.26628	1.96026	1.80838	1.7666	0.6104	0.3234	0.3136	0.27538	0.18578
105	7.23218	2.53924	1.02471	0.507586	0.368675	0.383632	0.458949	0.552216	0.641696	0.716775	0.72082	0.810928	2.3364	5.14634	3.46893	2.38204	1.94143	1.70693	1.554	1.4393	1.34574	1.04006	0.922526	0.957331	1.07478	1.22055	1.71317	1.91159	1.98707	1.82888	1.81192	1.86565	2.01709	2.13858	2.19744	2.33815	2.27983	2.36431	2.29722	2.19888	2.15772	1.87991	1.80676	1.81574	0.602	0.3472	0.3332	0.2884	0.19068
107.5	7.15303	2.47637	0.993925	0.499633	0.369386	0.381197	0.445397	0.522952	0.594682	0.651973	0.611558	0.710979	2.28504	5.1201	3.36131	2.25049	1.80292	1.5667	1.41492	1.30356	1.21518	0.950274	0.867909	0.926312	1.04985	1.19241	1.66078	1.8501	1.9239	1.77708	1.75872	1.80186	1.93378	2.04532	2.08647	2.23139	2.13342	2.20129	2.1539	2.03521	2.04889	1.79836	1.79925	1.85282	0.6034	0.3766	0.3584	0.3024	0.1974
110	7.07686	2.41789	0.966941	0.493863	0.370597	0.378076	0.430714	0.492899	0.547982	0.589288	0.524965	0.64293	2.26872	5.07041	3.22087	2.10172	1.65593	1.42326	1.27618	1.17071	1.08933	0.868056	0.818191	0.896103	1.02246	1.15989	1.60428	1.78601	1.85929	1.72187	1.70032	1.73165	1.84696	1.94466	1.97813	2.12537	1.99608	2.04675	2.01159	1.88741	1.94785	1.72151	1.78883	1.87482	0.616	0.4116	0.3836	0.3164	0.20524
112.5	7.00363	2.36357	0.94342	0.489992	0.372235	0.374522	0.415533	0.463087	0.503	0.530437	0.461596	0.604769	2.27721	4.98948	3.05021	1.94037	1.50542	1.2816	1.14265	1.04538	0.972591	0.796169	0.774814	0.867733	0.993978	1.12496	1.54719	1.72292	1.79641	1.66554	1.6392	1.65841	1.76104	1.84174	1.8791	2.02665	1.87563	1.91041	1.87706	1.76513	1.86151	1.65462	1.77817	1.88023	0.6384	0.4536	0.4158	0.3346	0.21448
115	6.93337	2.31321	0.923042	0.487756	0.374245	0.370783	0.400453	0.434458	0.460987	0.476912	0.42121	0.593496	2.29978	4.87188	2.85404	1.77235	1.35725	1.14736	1.01974	0.932761	0.869863	0.737879	0.739865	0.842854	0.966326	1.09004	1.49276	1.66395	1.73798	1.6104	1.57795	1.5855	1.67996	1.74138	1.79465	1.94046	1.77745	1.79936	1.75576	1.67483	1.795	1.60183	1.76908	1.869	0.6692	0.5012	0.448	0.3528	0.22484
117.5	6.86612	2.26663	0.905506	0.486914	0.376583	0.367095	0.38601	0.40784	0.423016	0.429957	0.402885	0.605426	2.32622	4.7155	2.63929	1.60476	1.21806	1.0268	0.913374	0.838446	0.786427	0.69691	0.716053	0.823673	0.941859	1.05772	1.44372	1.61153	1.68603	1.55852	1.51904	1.51603	1.60694	1.64779	1.72838	1.87041	1.70428	1.71763	1.65164	1.61938	1.75143	1.56614	1.76247	1.84252	0.7126	0.5544	0.4858	0.3724	0.23618
120	6.80193	2.22365	0.890537	0.487253	0.37922	0.363673	0.372678	0.383939	0.389968	0.390554	0.405168	0.636516	2.34767	4.52215	2.41509	1.4458	1.09515	0.926593	0.82979	0.768324	0.727848	0.677356	0.706653	0.812897	0.923317	1.03082	1.40226	1.56731	1.64185	1.51161	1.46462	1.45263	1.54432	1.56442	1.68216	1.81844	1.65641	1.6662	1.56711	1.59815	1.73174	1.54951	1.75862	1.80366	0.7644	0.616	0.5236	0.392	0.24808
122.5	6.74086	2.18411	0.877881	0.488585	0.382137	0.360714	0.360867	0.363338	0.362546	0.359442	0.426221	0.682644	2.35725	4.29794	2.19267	1.30454	0.996273	0.853724	0.775435	0.728434	0.699819	0.683568	0.715413	0.813682	0.913795	1.01232	1.37018	1.53236	1.60602	1.47089	1.41642	1.39739	1.49357	1.49384	1.65622	1.78489	1.63203	1.64322	1.50314	1.60746	1.73479	1.55317	1.75776	1.75684	0.8274	0.6804	0.5656	0.413	0.26068
125	6.68295	2.14785	0.867306	0.490747	0.385332	0.358403	0.350926	0.346508	0.341277	0.337126	0.463958	0.739865	2.35054	4.05334	1.98501	1.19072	0.929434	0.815234	0.756746	0.724772	0.707988	0.720003	0.746416	0.829559	0.916724	1.00545	1.34915	1.50742	1.57868	1.43706	1.37566	1.35176	1.45538	1.43778	1.64942	1.76875	1.62785	1.64462	1.45946	1.64129	1.75768	1.57771	1.76065	1.70795	0.8988	0.7504	0.6076	0.434	0.27384
127.5	6.62822	2.11471	0.858593	0.493602	0.388815	0.356903	0.343145	0.333811	0.326527	0.323899	0.516169	0.804593	2.3258	3.8028	1.80643	1.11433	0.902594	0.81799	0.779915	0.763074	0.757749	0.79105	0.803913	0.864331	0.935833	1.01375	1.34106	1.49326	1.55979	1.41036	1.34308	1.31661	1.42972	1.39714	1.6596	1.76805	1.6397	1.66485	1.43478	1.69219	1.79617	1.62315	1.76881	1.66402	0.98	0.8274	0.6496	0.4578	0.2884
130	6.57662	2.08451	0.851534	0.497028	0.392601	0.356359	0.337753	0.325502	0.318506	0.319852	0.580614	0.873728	2.2839	3.56409	1.67192	1.08523	0.923329	0.868378	0.850625	0.848559	0.853991	0.900815	0.892098	0.921927	0.975061	1.04105	1.34826	1.49105	1.54945	1.39063	1.31892	1.29224	1.41602	1.37214	1.68405	1.78024	1.66325	1.69771	1.42706	1.75222	1.8452	1.68871	1.7846	1.6327	1.0696	0.9072	0.6944	0.4788	0.3024
132.5	6.52809	2.05704	0.845926	0.500915	0.396705	0.356889	0.334915	0.321726	0.317273	0.324887	0.655085	0.944714	2.22812	3.35725	1.59643	1.11266	0.998442	0.971972	0.973738	0.985638	1.00083	1.05288	1.01488	1.00621	1.03842	1.09141	1.37377	1.50258	1.54818	1.37743	1.30302	1.27842	1.41323	1.36245	1.72004	1.80271	1.69457	1.73727	1.43371	1.8138	1.89951	1.7726	1.81087	1.62151	1.1676	0.9884	0.7378	0.5012	0.3136
135	6.48253	2.03212	0.841574	0.505164	0.401139	0.358577	0.334728	0.32252	0.322733	0.338715	0.737445	1.01555	2.16367	3.20331	1.59394	1.20465	1.13353	1.13316	1.15295	1.1776	1.20128	1.25002	1.17566	1.12078	1.12983	1.16898	1.4213	1.53044	1.55711	1.37021	1.29491	1.27455	1.42001	1.36737	1.76526	1.83322	1.73074	1.77872	1.45182	1.87047	1.95421	1.87193	1.85056	1.63719	1.2712	1.0752	0.7812	0.5236	0.3276
137.5	6.43983	2.00954	0.838293	0.509686	0.405909	0.361472	0.337207	0.327797	0.334632	0.360853	0.825648	1.08476	2.09714	3.12282	1.67657	1.36747	1.33257	1.35478	1.39048	1.42626	1.45697	1.49391	1.37709	1.26876	1.25287	1.27783	1.4952	1.578	1.57808	1.36838	1.29391	1.27974	1.43482	1.38598	1.81827	1.87029	1.77013	1.81897	1.47844	1.91749	2.00531	1.98291	1.90653	1.68538	1.3818	1.162	0.8232	0.5474	0.3416
140	6.39988	1.98909	0.835907	0.514397	0.411004	0.365572	0.342283	0.337342	0.352541	0.39061	0.917729	1.15131	2.03588	3.13425	1.85359	1.60505	1.59743	1.63772	1.68666	1.7317	1.76781	1.78486	1.6209	1.45259	1.41066	1.42171	1.60019	1.64928	1.61359	1.37149	1.29926	1.29294	1.45605	1.41731	1.87877	1.91345	1.81262	1.85715	1.51081	1.95218	2.05014	2.1013	1.9816	1.77072	1.4952	1.2488	0.8652	0.5684	0.3556
142.5	6.36261	1.97059	0.834258	0.51922	0.416397	0.370822	0.349787	0.350794	0.375847	0.427081	1.0118	1.21453	1.98727	3.25247	2.13064	1.91852	1.92757	1.98065	2.03977	2.09195	2.13176	2.12153	1.90777	1.67388	1.60555	1.60377	1.74104	1.74862	1.66661	1.37931	1.31024	1.3131	1.48223	1.46042	1.94761	1.96325	1.85948	1.89465	1.54655	1.97413	2.08756	2.22304	2.07876	1.89734	1.6156	1.3342	0.9072	0.5922	0.3696
145	6.32796	1.95386	0.833198	0.524075	0.42203	0.3771	0.35944	0.367643	0.403749	0.469139	1.10603	1.27403	1.95812	3.48743	2.50898	2.3058	2.31977	2.37982	2.44575	2.50285	2.54467	2.50079	2.23716	1.93323	1.83899	1.82633	1.92211	1.8803	1.74033	1.39181	1.32618	1.3392	1.51206	1.51445	2.02667	2.02112	1.91309	1.93491	1.58385	1.98504	2.11801	2.34486	2.20153	2.06946	1.736	1.4196	0.9464	0.6132	0.3836
147.5	6.2959	1.93877	0.832594	0.528877	0.427809	0.384209	0.370851	0.387226	0.435262	0.515457	1.19867	1.32963	1.95405	3.84307	2.98509	2.76145	2.76803	2.82897	2.89826	2.95804	3.00023	2.91763	2.60723	2.23007	2.11127	2.09054	2.14678	2.04794	1.83769	1.4091	1.34653	1.37032	1.54449	1.57853	2.11839	2.08896	1.97644	1.98279	1.62146	1.98849	2.14328	2.46462	2.35398	2.29183	1.8592	1.5036	0.9842	0.637	0.3962
150	6.26647	1.92518	0.832325	0.533534	0.433606	0.391887	0.38353	0.408753	0.46925	0.564539	1.28808	1.38124	1.97898	4.31663	3.55047	3.27665	3.26361	3.31944	3.38869	3.44901	3.49009	3.36521	3.0147	2.56251	2.42127	2.39606	2.4169	2.25396	1.96088	1.43134	1.37074	1.40558	1.57866	1.65168	2.22524	2.16866	2.05242	2.04372	1.65872	1.98937	2.16606	2.58135	2.54037	2.56962	1.9796	1.582	1.022	0.658	0.4088
152.5	6.2397	1.91299	0.832284	0.537949	0.439263	0.399818	0.396912	0.431344	0.504477	0.614795	1.37273	1.42886	2.0348	4.89846	4.19184	3.8395	3.79537	3.84046	3.9065	3.96541	4.0041	3.83503	3.4547	2.92708	2.76626	2.74071	2.73217	2.49893	2.11087	1.45855	1.39824	1.4441	1.61384	1.73259	2.34901	2.26152	2.14322	2.12266	1.69541	1.99323	2.18944	2.69499	2.76439	2.90761	2.0986	1.6604	1.0542	0.6776	0.42
155	6.21565	1.90213	0.832382	0.542028	0.444613	0.407662	0.410401	0.454086	0.539685	0.664623	1.4513	1.47253	2.12112	5.57225	4.89163	4.43545	4.35013	4.37951	4.43957	4.49539	4.53067	4.31719	3.92062	3.31862	3.14157	3.12015	3.0896	2.781	2.28692	1.4905	1.42834	1.48494	1.64929	1.81954	2.49018	2.36772	2.24965	2.22312	1.73157	2.00548	2.21635	2.80602	3.02804	3.30884	2.2148	1.7332	1.0864	0.6972	0.4312
157.5	6.19437	1.89254	0.832549	0.545692	0.449495	0.415093	0.423425	0.476108	0.573677	0.71251	1.52272	1.51225	2.23518	6.31576	5.62872	5.04794	4.91325	4.92292	4.97472	5.02613	5.05726	4.80073	4.40397	3.73003	3.54042	3.52757	3.48307	3.0955	2.48624	1.52658	1.46019	1.52703	1.68412	1.91029	2.64745	2.48604	2.37079	2.34626	1.76738	2.03061	2.24901	2.91501	3.33055	3.77281	2.3226	1.799	1.1144	0.7154	0.441
160	6.17586	1.88417	0.832736	0.548884	0.453782	0.421831	0.435486	0.496645	0.605402	0.757128	1.58621	1.54804	2.37202	7.10185	6.37948	5.65912	5.46933	5.45638	5.49827	5.54431	5.57087	5.27408	4.89431	4.15222	3.95377	3.95352	3.9031	3.43473	2.70384	1.56579	1.4928	1.5692	1.71731	2.00216	2.8175	2.61367	2.5038	2.49043	1.80296	2.07139	2.28856	3.02223	3.66737	4.29368	2.4276	1.862	1.1424	0.7336	0.4508
162.5	6.16009	1.87697	0.832915	0.551576	0.457395	0.427677	0.446204	0.515098	0.634021	0.797413	1.64128	1.57989	2.52465	7.89998	7.11884	6.25075	6.00284	5.96564	5.99663	6.03677	6.05859	5.72544	5.37928	4.57407	4.3703	4.38595	4.33685	3.78795	2.93255	1.60676	1.52506	1.6102	1.74775	2.09212	2.99499	2.74632	2.64407	2.65099	1.83817	2.12833	2.33482	3.1274	4.02967	4.85879	2.5214	1.918	1.1662	0.7476	0.4578
165	6.14698	1.87091	0.833072	0.553774	0.460309	0.432523	0.455341	0.531063	0.658949	0.832606	1.68781	1.60772	2.6846	8.67779	7.82153	6.80493	6.49878	6.43704	6.45684	6.49094	6.50813	6.14331	5.84482	4.98269	4.77667	4.81043	4.7685	4.14173	3.16327	1.64781	1.55582	1.64877	1.77441	2.17709	3.17295	2.87859	2.78557	2.82061	1.8726	2.19928	2.38624	3.22939	4.40416	5.44794	2.604	1.9684	1.1844	0.7616	0.4648
167.5	6.13639	1.86593	0.833202	0.555506	0.462555	0.436356	0.462802	0.544334	0.679861	0.862261	1.72592	1.63146	2.8424	9.40284	8.46324	7.30488	6.94333	6.85809	6.86706	6.89536	6.90828	6.5169	6.2757	5.36382	5.15799	5.2107	5.17995	4.48064	3.3855	1.68709	1.58398	1.68369	1.79654	2.2541	3.34329	3.0044	2.92143	2.98988	1.90541	2.27951	2.44003	3.32607	4.77355	6.03375	2.6796	2.009	1.204	0.7728	0.4718
170	6.12812	1.86197	0.833308	0.556819	0.464202	0.439237	0.468613	0.554884	0.69666	0.886217	1.75598	1.65101	2.98833	10.0443	9.02163	7.73557	7.32426	7.21783	7.21698	7.24003	7.24921	6.83652	6.65621	5.7026	5.49857	5.56961	5.55197	4.78822	3.58799	1.72267	1.60852	1.71389	1.81379	2.32055	3.4975	3.11757	3.04456	3.14824	1.93538	2.36209	2.49245	3.41419	5.11762	6.58322	2.7412	2.044	1.218	0.784	0.476
172.5	6.12198	1.85898	0.83339	0.557768	0.465342	0.44128	0.472889	0.562812	0.709422	0.904525	1.77851	1.66631	3.11311	10.5746	9.4773	8.08423	7.63132	7.50712	7.49801	7.51668	7.5228	7.09394	6.97117	5.98449	5.78304	5.87028	5.86555	5.04818	3.75963	1.75267	1.62857	1.73841	1.82629	2.3743	3.62741	3.21233	3.14826	3.28506	1.96103	2.43876	2.53929	3.48964	5.41492	7.06064	2.7888	2.072	1.2306	0.791	0.4816
175	6.11776	1.85689	0.83345	0.558404	0.466072	0.442616	0.475785	0.568288	0.718326	0.917367	1.79408	1.67728	3.20864	10.9708	9.81446	8.34067	7.85643	7.71883	7.70348	7.71885	7.72271	7.28258	7.20707	6.19647	5.99755	6.09748	6.10353	5.24585	3.8904	1.77545	1.64342	1.7565	1.83451	2.41375	3.72584	3.28376	3.22678	3.39065	1.9808	2.50109	2.57639	3.5479	5.64492	7.43153	2.828	2.0944	1.2376	0.7952	0.4844
177.5	6.1153	1.85566	0.833487	0.558767	0.466473	0.443362	0.47745	0.571486	0.723567	0.924959	1.80319	1.68388	3.26862	11.2157	10.0215	8.4975	7.99381	7.84788	7.82864	7.84196	7.84443	7.39769	7.3532	6.32814	6.13103	6.23905	6.25223	5.36951	3.97231	1.78968	1.65255	1.76759	1.8391	2.43784	3.78724	3.32816	3.27573	3.45732	1.99331	2.54181	2.60023	3.58483	5.79053	7.66698	2.856	2.1042	1.2432	0.7994	0.4858
180	6.11449	1.85526	0.833499	0.558886	0.4666	0.443601	0.477993	0.572536	0.725295	0.927469	1.80619	1.68608	3.28907	11.2985	10.0913	8.55028	8.03999	7.89123	7.87068	7.8833	7.8853	7.43637	7.4027	6.3728	6.17635	6.28715	6.30281	5.4116	4.00021	1.79452	1.65562	1.77132	1.84056	2.44593	3.80811	3.34322	3.29236	3.48011	1.99759	2.55596	2.60845	3.5975	5.8404	7.74772	2.856	2.1084	1.2432	0.8008	0.4872
[truncated: 8 more columns]
